# Supplementary material for: Separation of flavonoids with significant biological activity from Acacia mearnsii leaves
Source: Royal Society of Chemistry journal article supplement (doi:10.1039/d3ra00209h), 2023-01-01
Supplement: d3ra00209h1.pdf [file d3ra00209h1.pdf]

## Supporting Information

### Separation of flavonoids with significant biological activity from *Acacia mearnsii* leaves

Cuihua Wu <sup>a, b</sup>, Lingxiao He <sup>a, b</sup>, Yu Zhang <sup>a, b</sup>, Chaoqun You <sup>a, b</sup>, Xun Li <sup>a, b</sup>, Ping Jiang <sup>a, b</sup>, Fei Wang <sup>a, b</sup>, ✉

<sup>a</sup> Jiangsu Co-Innovation Center of Efficient Processing and Utilization of Forest Resources, College of Chemical Engineering, Nanjing Forestry University, Nanjing 210037, China

<sup>b</sup> Jiangsu Provincial Key Lab for Chemistry and Utilization of Agro-forest Biomass, Jiangsu Key Lab of Biomass Based Green Fuels and Chemicals, Nanjing 210037, China

\*Corresponding author: Fei Wang E-mail: hgwf@njfu.edu.cn

College of Chemical Engineering, Nanjing Forestry University, Nanjing, 210037, China.

Fax: +86 25 85427649

Tel: +86 25 85427649

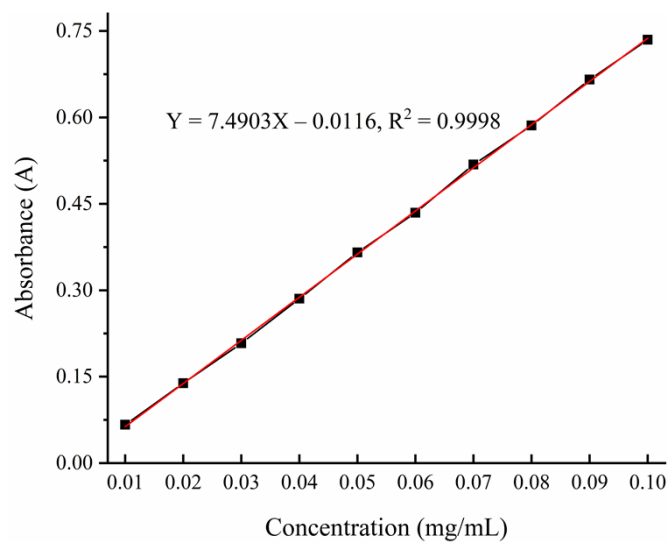

**Fig. S1** The standard curve of rutin.

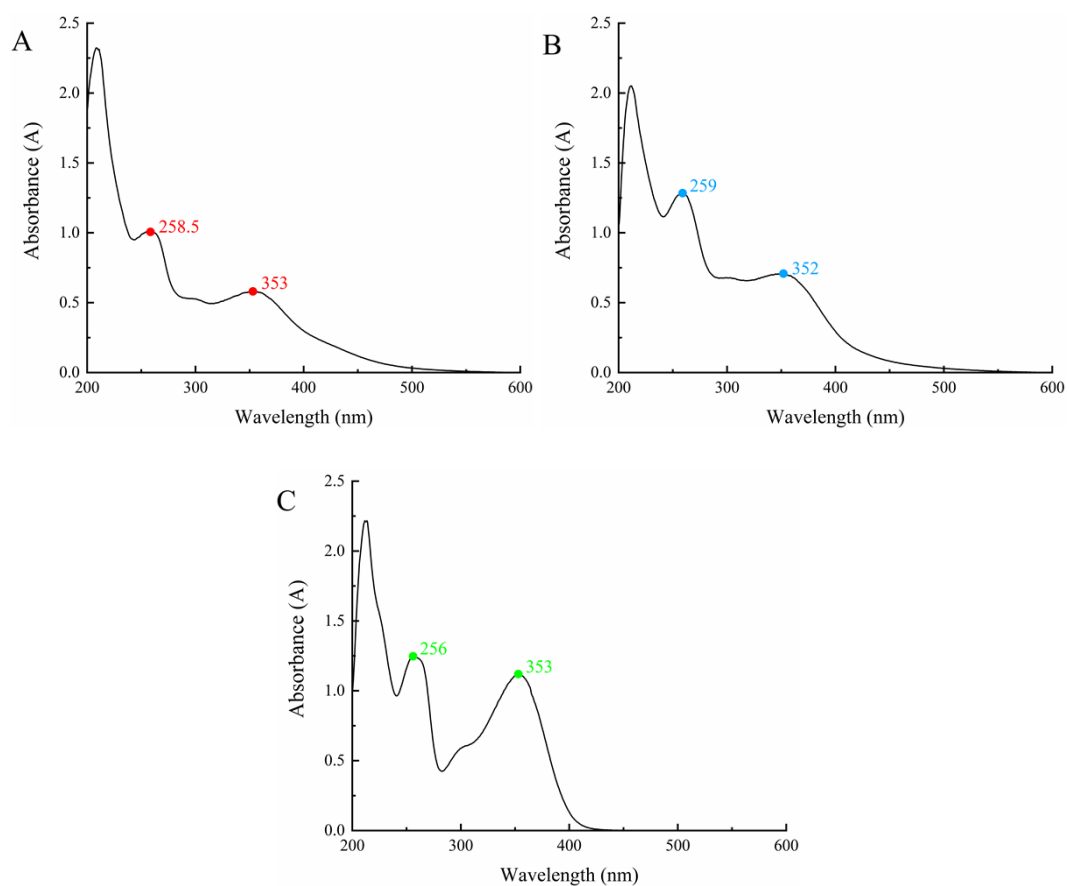

**Fig. S2** UV-Vis spectra of W1 (myricetin-3-O-glucoside) (A), W2 (myricetin-3-O-arabinoside) (B), and W3 (myricitrin) (C).

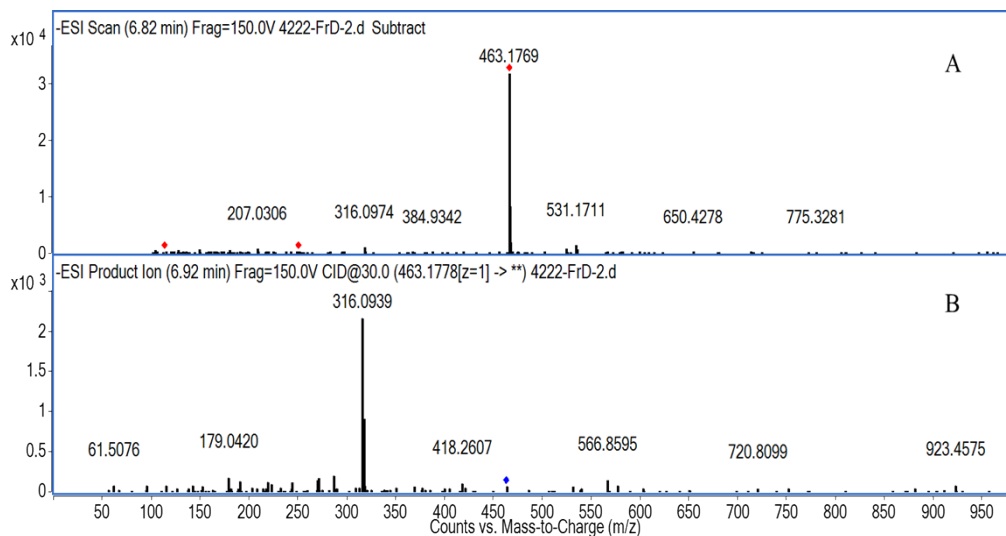

**Fig. S3** MS spectrum of W3 (myricitrin) (A) and MS/MS spectrum of W3 (B).

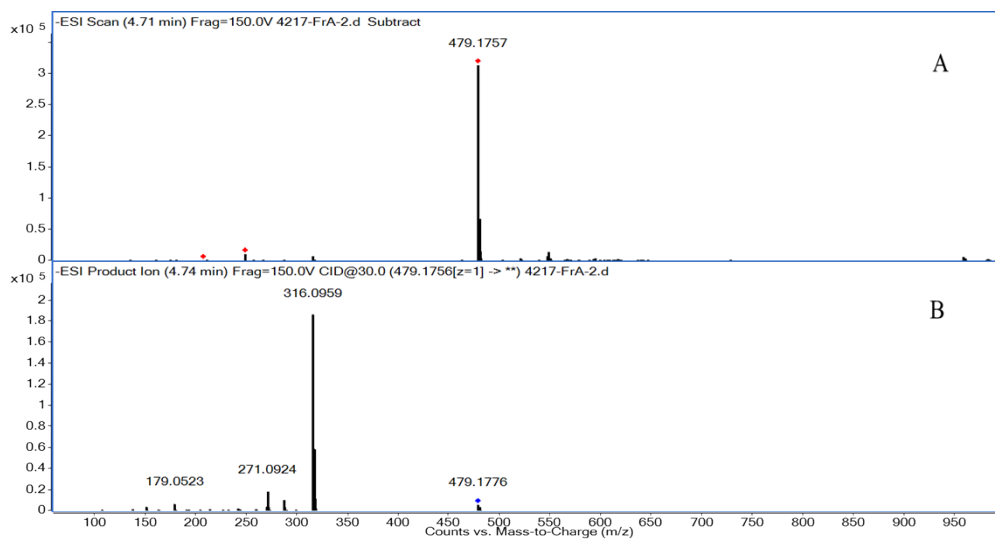

**Fig. S4** MS spectrum of W1 (myricetin-3-O-glucoside) (A) and MS/MS spectrum of W1 (B).

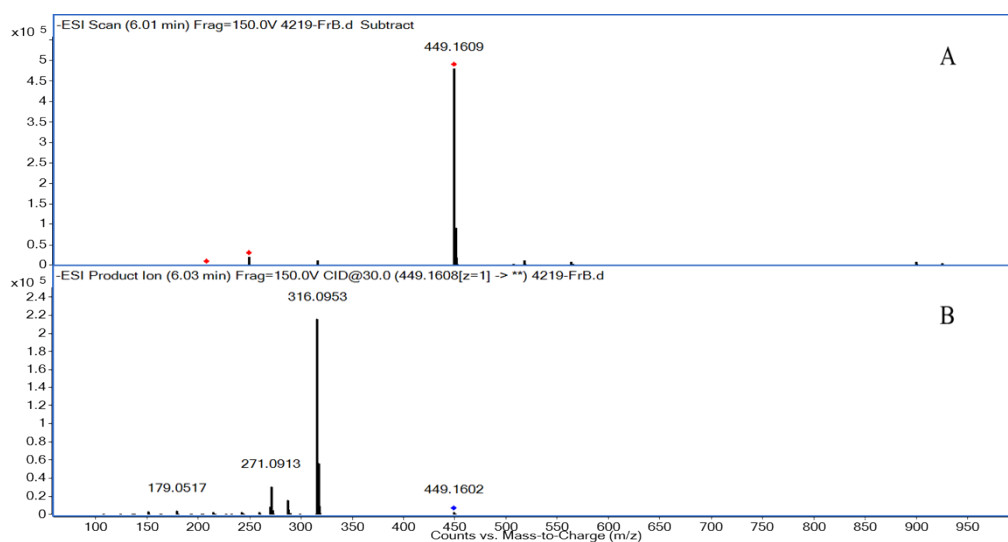

**Fig. S5** MS spectrum of W2 (myricetin-3-O-arabinoside) (A) and MS/MS spectrum of W2 (B).

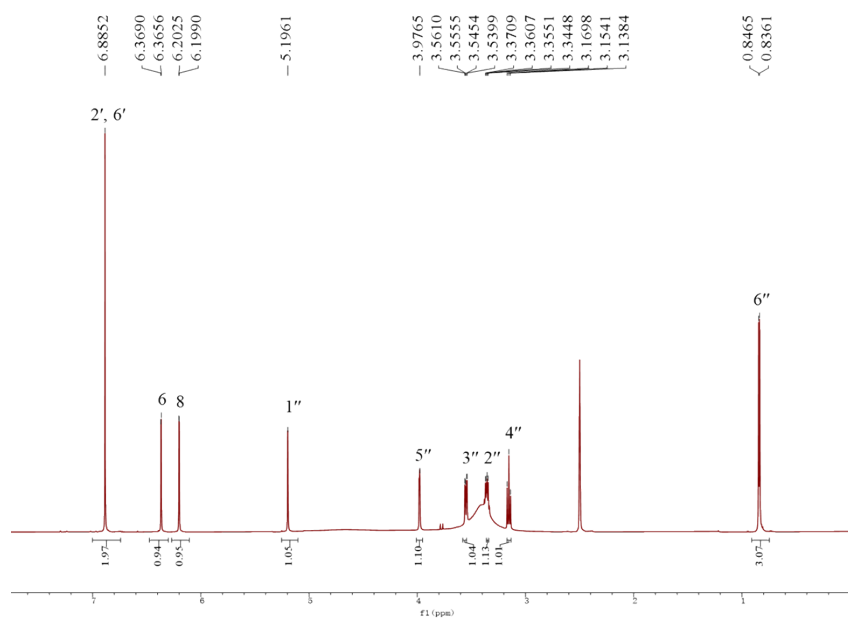

**Fig. S6**  $^1\text{H-NMR}$  spectrum of W3 (myricitrin) (600 MHz,  $\text{DMSO-}d_6$ ).

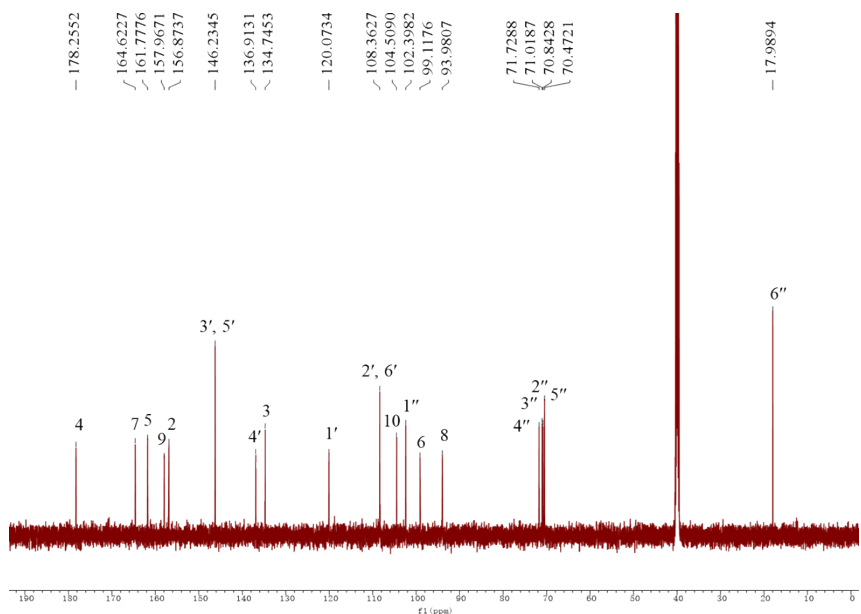

**Fig. S7**  $^{13}\text{C}$ -NMR spectrum of W3 (myricitrin) (150 MHz,  $\text{DMSO-}d_6$ ).

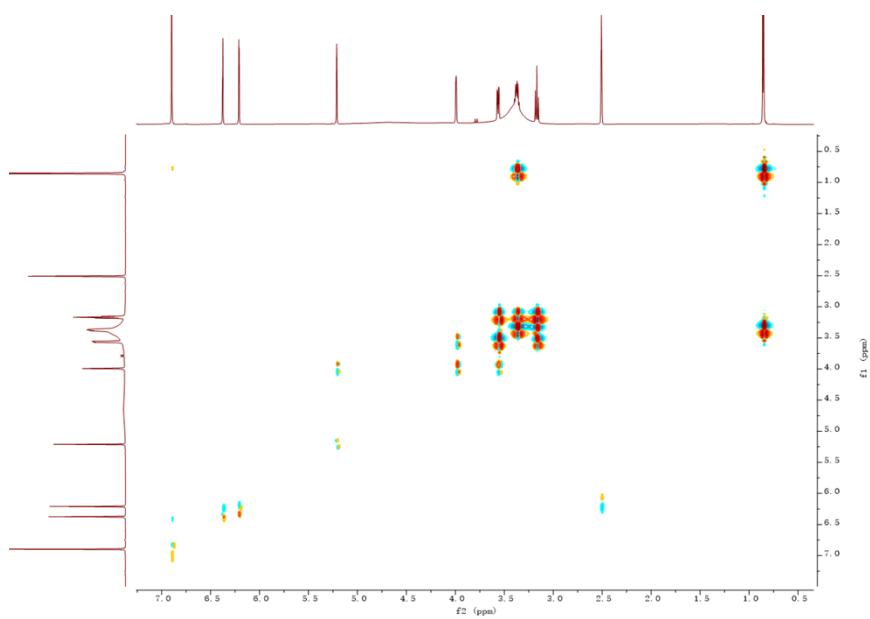

**Fig. S8**  $^1\text{H}$ - $^1\text{H}$  COSY spectrum of W3 (myricitrin).

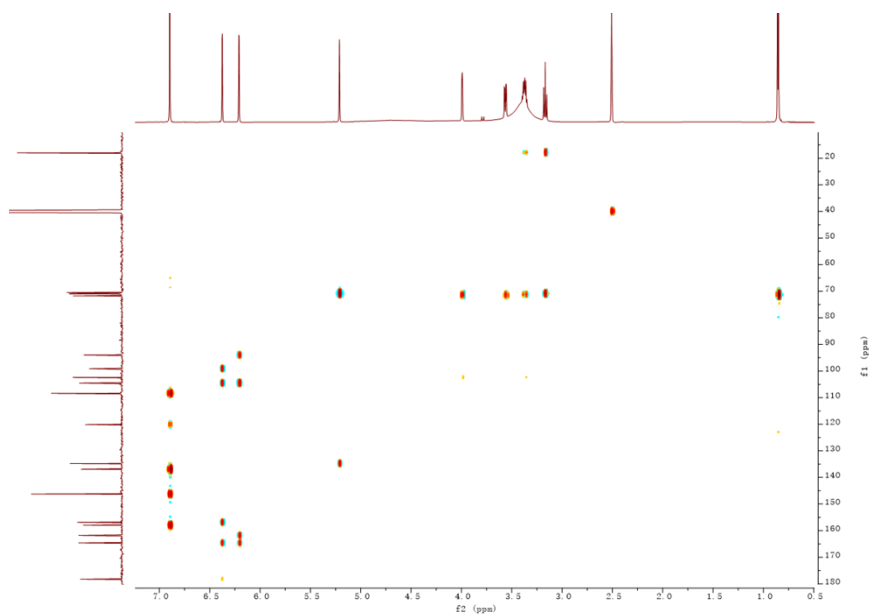

**Fig. S9** HMBC spectrum of W3 (myricitrin).

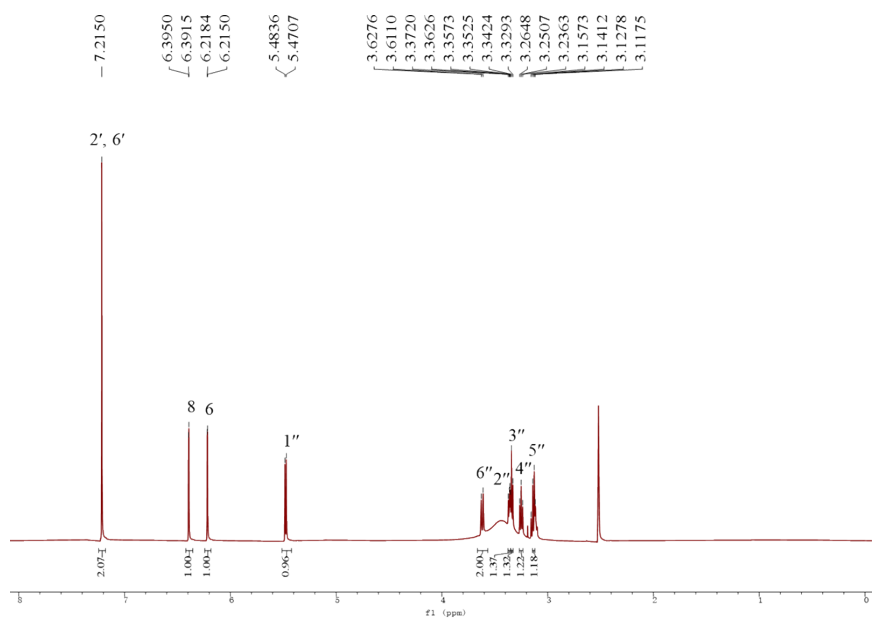

**Fig. S10**  $^1\text{H-NMR}$  spectrum of W1 (myricetin-3-O-glucoside) (600 MHz,  $\text{DMSO-}d_6$ ).

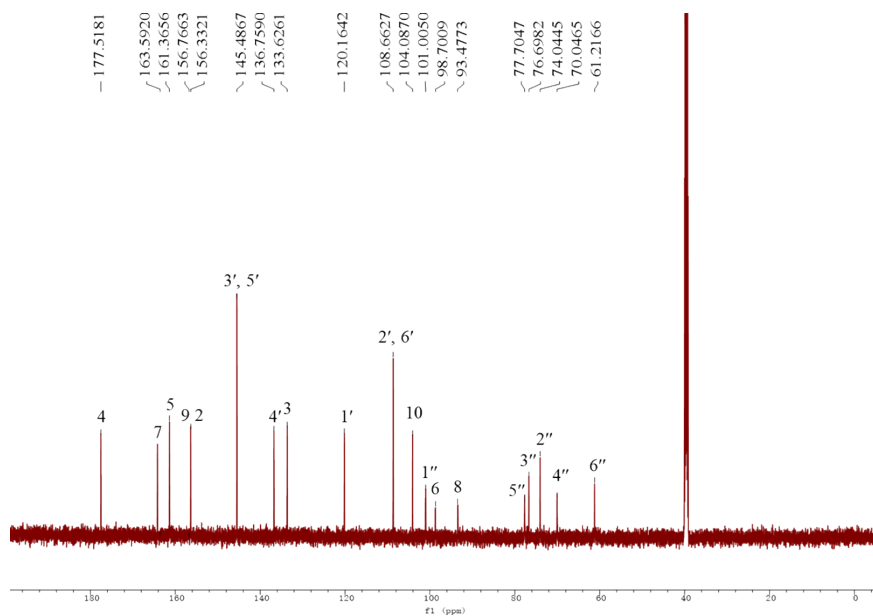

**Fig. S11**  $^{13}\text{C}$ -NMR spectrum of W1 (myricetin-3-O-glucoside) (150 MHz,  $\text{DMSO-}d_6$ ).

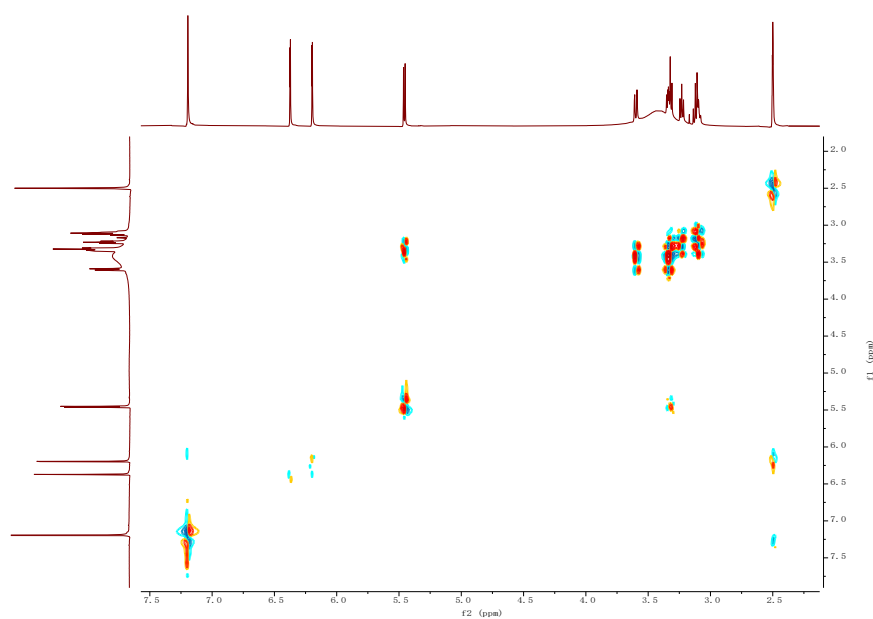

**Fig. S12**  $^1\text{H}$ - $^1\text{H}$  COSY spectrum of W1 (myricetin-3-O-glucoside).

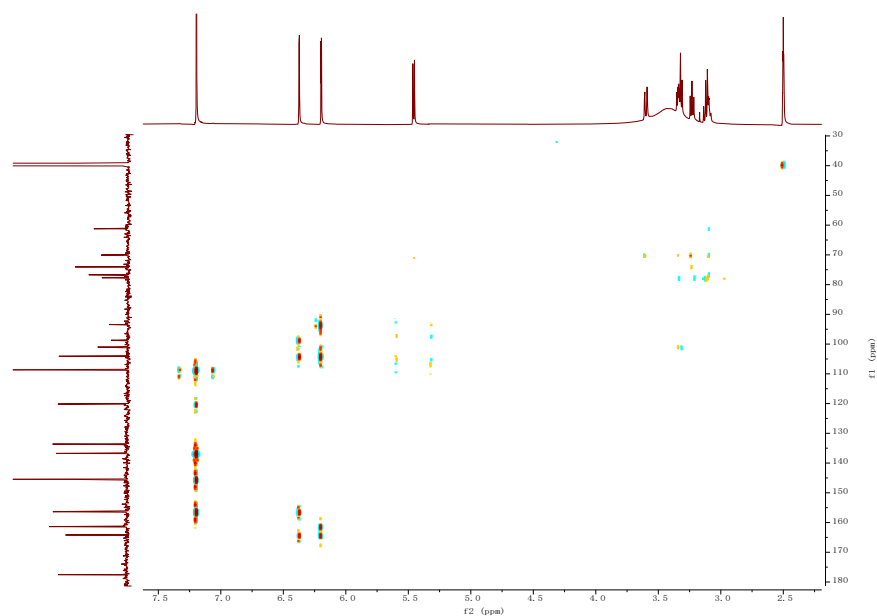

**Fig. S13** HMBC spectrum of W1 (myricetin-3-O-glucoside).
